# Supplementary material for: An Early Intervention in Gestural Communication in Chilean Children from Psychosocially At-Risk Backgrounds and Its Impact on Language Skills at 18 Months Old
Source: MDPI journal article supplement (doi:10.3390/languages9040146), 2024-04-16
Supplement: s1 [file s1]

## GESTURAL VOCABULARY REPORT

### Instructions

All children, in the process of learning to communicate, learn certain gestures. This Scale seeks to know the gestures that your son or daughter makes or has made previously, as well as their understanding of them.

**Understands:** Check if your child understands the following gestures, when they are performed by you or another adult.

**Performs:** Check if your child performs or has ever performed the following gestures.

| 1. ANIMALS  |             |          |                |             |          |
|-------------|-------------|----------|----------------|-------------|----------|
|             | Understands | Performs |                | Understands | Performs |
| Bear        |             |          | Giraffe        |             |          |
| Bird        |             |          | Horse          |             |          |
| Bug/fly/bee |             |          | Kangaroo       |             |          |
| Butterfly   |             |          | Lyon           |             |          |
| Cat         |             |          | Monkey         |             |          |
| Cow         |             |          | Mouse          |             |          |
| Crocodile   |             |          | Pig            |             |          |
| Chicken     |             |          | Rabbit         |             |          |
| Dog         |             |          | Snake          |             |          |
| Duck        |             |          | Spider         |             |          |
| Elephant    |             |          | Turtle         |             |          |
| Fish        |             |          | <b>Others:</b> |             |          |
| Frog        |             |          |                |             |          |

| 2. OBJECTS           |             |          |                |             |          |
|----------------------|-------------|----------|----------------|-------------|----------|
|                      | Understands | Performs |                | Understands | Performs |
| Airplane             |             |          | Ice cream      |             |          |
| Apple                |             |          | Juice          |             |          |
| Ball                 |             |          | Light          |             |          |
| Ballon               |             |          | Milk           |             |          |
| Banana               |             |          | Moon           |             |          |
| Bib                  |             |          | Rain           |             |          |
| Book                 |             |          | Shoes          |             |          |
| Bottle (baby bottle) |             |          | Slide          |             |          |
| Bubbles              |             |          | Socks          |             |          |
| Cake                 |             |          | Song           |             |          |
| Candle               |             |          | Stars          |             |          |
| Car                  |             |          | Sun            |             |          |
| Cereal               |             |          | Swing          |             |          |
| Cheese               |             |          | Teddy bear     |             |          |
| Coat                 |             |          | Telephone      |             |          |
| Comb                 |             |          | Toothbrush     |             |          |
| Cookie               |             |          | Train          |             |          |
| Diaper               |             |          | Tree           |             |          |
| Flower               |             |          | Water          |             |          |
| Hat                  |             |          | <b>Others:</b> |             |          |
| Hair                 |             |          |                |             |          |

| 3. PEOPLE OR CHARACTERS |             |          |                |             |          |
|-------------------------|-------------|----------|----------------|-------------|----------|
|                         | Understands | Performs |                | Understands | Performs |
| Baby                    |             |          | Monster        |             |          |
| Dad                     |             |          | <b>Others:</b> |             |          |
| Mum                     |             |          |                |             |          |
| Teacher                 |             |          |                |             |          |

| 3. ACTIONS      |             |          |                |             |          |
|-----------------|-------------|----------|----------------|-------------|----------|
|                 | Understands | Performs |                | Understands | Performs |
| Breastfeeding   |             |          | Seat           |             |          |
| Brush the teeth |             |          | See            |             |          |
| Clap/hurray     |             |          | Sleep          |             |          |
| Clean           |             |          | Smell          |             |          |
| Drink           |             |          | Share          |             |          |
| Eat             |             |          | Take a bath    |             |          |
| Go out          |             |          | To comb        |             |          |
| Hello/Bye       |             |          | Wash           |             |          |
| It's over       |             |          | Wash the hands |             |          |
| Listen          |             |          | <b>Others:</b> |             |          |
| Play            |             |          |                |             |          |

| 4. REQUESTS |             |          |                       |             |          |
|-------------|-------------|----------|-----------------------|-------------|----------|
|             | Understands | Performs |                       | Understands | Performs |
| Give me     |             |          | Silence               |             |          |
| Go!         |             |          | Stop                  |             |          |
| Help        |             |          | Thank you             |             |          |
| I am sorry  |             |          | Where? / I don't know |             |          |
| It is time  |             |          | <b>Others:</b>        |             |          |
| More        |             |          |                       |             |          |
| Please      |             |          |                       |             |          |

| 5. AFFECTS OR EMOTIONS |             |          |                |             |          |
|------------------------|-------------|----------|----------------|-------------|----------|
|                        | Understands | Performs |                | Understands | Performs |
| Angry                  |             |          | Sad            |             |          |
| Happy                  |             |          | Scare          |             |          |
| I love you             |             |          | <b>Others:</b> |             |          |
| Love                   |             |          |                |             |          |

| 6. ADJECTIVES OR STATES |             |          |                |             |          |
|-------------------------|-------------|----------|----------------|-------------|----------|
|                         | Understands | Performs |                | Understands | Performs |
| Big                     |             |          | Hurt           |             |          |
| Small                   |             |          | Latter         |             |          |
| Cold                    |             |          | Noise/Noisy    |             |          |
| Hot                     |             |          | Soft           |             |          |
| Inside                  |             |          | Yummy          |             |          |
| Outside                 |             |          | <b>Others:</b> |             |          |
| Crazy                   |             |          |                |             |          |
| Dirty                   |             |          |                |             |          |

## This image shows a single sheet of white paper with horizontal ruling lines. The lines are evenly spaced and extend across the width of the page. There are no margins, text, or other markings on the paper.

Note: The use of this grid is restricted to this project. Any other use needs previous authorization (write to [chfarkas@uc.cl](mailto:chfarkas@uc.cl)).
